# Supplementary material for: Adamanzanes—bi- and tricyclic tetraamines and their coordination compoundsElectronic supplementary information (ESI) available: tables of variations in Nax–M–Nax angles as a function of cavity size and the radius of the central ion. See http://www.rsc.org/suppdata/dt/b3/b300510k/
Source: Royal Society of Chemistry journal article supplement (doi:10.1039/b300510k), 2003-03-18
Supplement: b300510k.pdf [file b300510k.pdf]

Table S1. Variation of the  $N_{ax}$ -M- $N_{ax}$  angle for six-coordinated Ni(II) and Co(III)

complexes as a function of the cavity size of the macrobicyclic L.

| L                                                                         | Complex                                                  | $N_{ax}$ -M- $N_{ax}$ angle/degree | Reference |
|---------------------------------------------------------------------------|----------------------------------------------------------|------------------------------------|-----------|
| N,N'-Me <sub>2</sub> [2 <sup>5</sup> ]adz                                 | [Ni(L)(acac)] <sup>+</sup>                               | 161.6(1)                           | 42        |
| [2 <sup>4</sup> .3 <sup>1</sup> ]adz                                      | [Ni(L)(H <sub>2</sub> O) <sub>2</sub> ] <sup>2+</sup>    | 168.43(5)                          | 43        |
|                                                                           | [Ni(L)(η <sup>2</sup> -NO <sub>2</sub> )] <sup>+</sup>   | 170.3(3)                           | 43        |
|                                                                           | [Ni(L)(η <sup>2</sup> -NO <sub>3</sub> )] <sup>+</sup>   | 170.14(9)                          | 43        |
| N,N'-Me <sub>2</sub> [2 <sup>2</sup> .3 <sup>2</sup> .2 <sup>1</sup> ]adz | [Ni(L)(acac)] <sup>+</sup>                               | 174.6(1)                           | 42        |
|                                                                           | [Ni(L)(H <sub>2</sub> O) <sub>2</sub> ] <sup>2+</sup>    | 175.39(5)                          | 42        |
| [(2.3) <sup>2</sup> .2 <sup>1</sup> ]adz                                  | [Ni(L)(H <sub>2</sub> O) <sub>2</sub> ] <sup>2+</sup>    | 176.77(5)                          | 38        |
| [3 <sup>5</sup> ]adz                                                      | [Ni(L)(η <sup>2</sup> -NO <sub>3</sub> )] <sup>+</sup>   | 176.5(2)                           | 44        |
|                                                                           | [Ni(L)(η <sup>2</sup> -ClO <sub>4</sub> )] <sup>+</sup>  | 177.34(10)                         | 44        |
| Me <sub>2</sub> [2 <sup>5</sup> ]adz                                      | [Co(L)Cl <sub>2</sub> ] <sup>+</sup>                     | 168.8(4)                           | 39        |
| [2 <sup>4</sup> .3 <sup>1</sup> ]adz                                      | [Co(L)Cl <sub>2</sub> ] <sup>+</sup>                     | 173.5(3)                           | 38        |
| [3 <sup>5</sup> ]adz                                                      | [Co(L)(η <sup>2</sup> -CO <sub>3</sub> )] <sup>+</sup>   | 176.8(3)                           | 45        |
|                                                                           | [Co(L)(η <sup>2</sup> -HCO <sub>3</sub> )] <sup>2+</sup> | 177.7(4)                           | 45        |
|                                                                           | [Co(L)(η <sup>2</sup> -SO <sub>4</sub> )] <sup>+</sup>   | 176.02(15)                         | 45        |

Table S2. Variation of the  $N_{ax}$ -M- $N_{ax}$  angle for six-coordinated complexes,

$M(L)X_2^{z+}$ , as a function of the radius of the central ion for  $L = Me_2[2^5]adz$ .

| M                   | radius/ppm <sup>a</sup> | $N_{ax}$ -M- $n_{ax}$ /degree | Reference |
|---------------------|-------------------------|-------------------------------|-----------|
| Mn(II) <sup>b</sup> | 97                      | 144.0(2)                      | 47        |
| Fe(II) <sup>b</sup> | 92                      | 145.78(7)                     | 47        |
| Zn(II) <sup>b</sup> | 88.0                    | 148.30(8)                     | 39        |
| Co(II) <sup>b</sup> | 88.5                    | 149.81(9)                     | 42        |
| Cu(II) <sup>c</sup> | 87                      | 164.85(13)                    | 42        |
| Ni(II) <sup>d</sup> | 83                      | 161.58(13)                    | 42        |

<sup>a</sup>Radii for octahedral coordination (high spin in the case of Mn(II), Fe(II) and

Co(II)) complexes have been taken from reference 46. <sup>b</sup>X = Cl. <sup>c</sup>X = MeCN. <sup>d</sup>X<sub>2</sub>

= acac<sup>-</sup>.
